# Supplementary material for: Aerosol construction of multi-shelled LiMn2O4hollow microspheres as a cathode in lithium ion batteries
Source: Royal Society of Chemistry journal article supplement (doi:10.1039/c5nj02501j), 2015-11-30
Supplement: c5nj02501j1.pdf [file c5nj02501j1.pdf]

## Electronic Supplementary Information

### Aerosol construction of multi-shelled $\text{LiMn}_2\text{O}_4$ hollow microspheres as a cathode in lithium ion batteries

*Xiaofeng Niu,<sup>a</sup> Yunfeng Li,<sup>a,b</sup> Yanjie Hu,<sup>a,\*</sup> Hao Jiang,<sup>a</sup> Xiaoyu Hou,<sup>a</sup> Wenge Li,<sup>a</sup>  
Shengjie Qiu,<sup>b</sup> and Chunzhong Li<sup>a,\*</sup>*

<sup>a</sup> Key Laboratory for Ultrafine Materials of Ministry of Education, School of Materials Science and Engineering, East China University of Science & Technology, Shanghai 200237, China

<sup>b</sup> Shanghai Nanotechnology Promotion Center, Shanghai 200237, China

#### The corresponding authors\*

Prof. C. Li (czli@ecust.edu.cn) and Prof. Y. Hu (huyanjie@ecust.edu.cn)

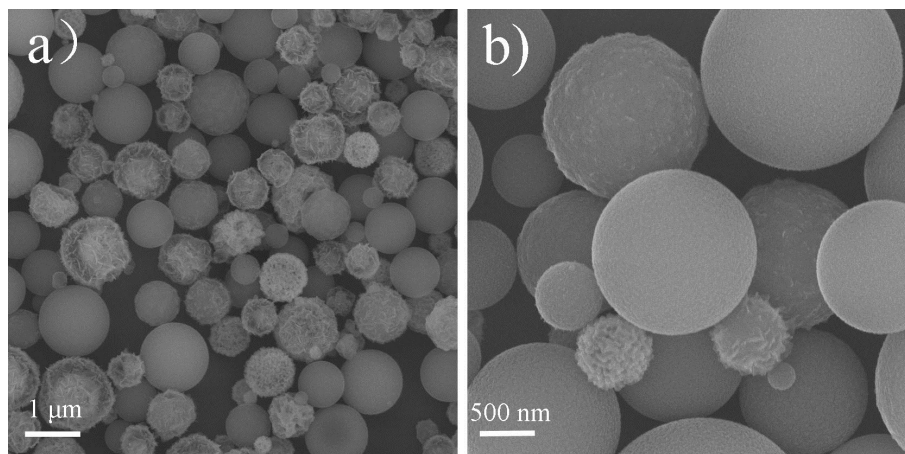

**Figure S1** SEM images of  $\text{LiMn}_2\text{O}_4\text{-C}$  precursor microspheres prepared by an one-step ultrasonic spray pyrolysis process.

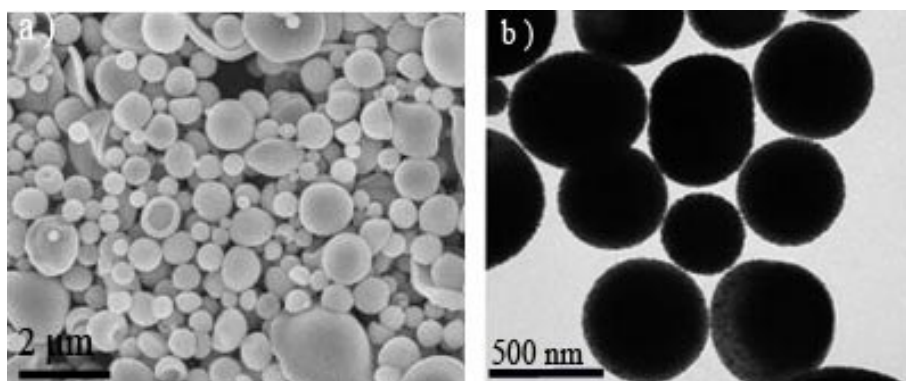

**Figure S2** (a) SEM image and (b) TEM image of  $\text{LiMn}_2\text{O}_4$  dense microspheres without sucrose prepared by an one-step ultrasonic spray pyrolysis process.

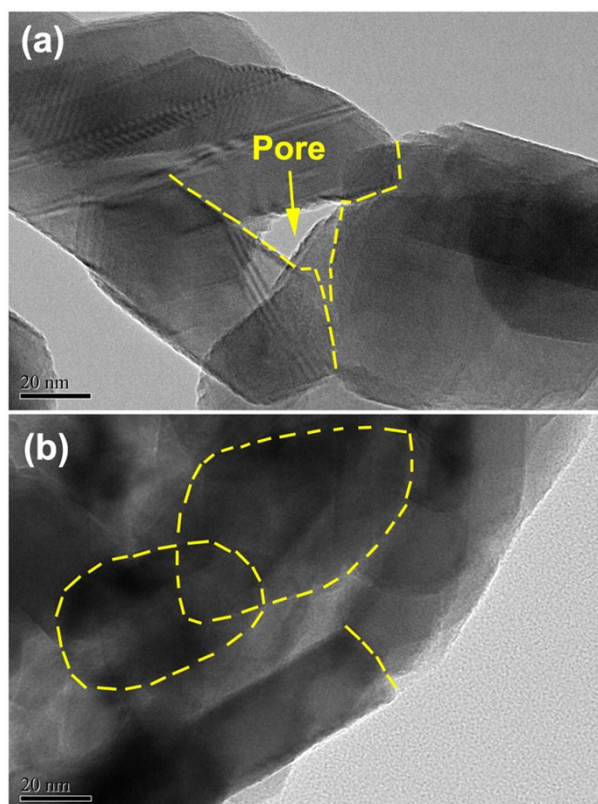

**Figure S3** (a, b) HRTEM images of the as-prepared ms-LMO HMs (it demonstrates that there exists a bridge-link interaction among the  $\text{LiMn}_2\text{O}_4$  particles).

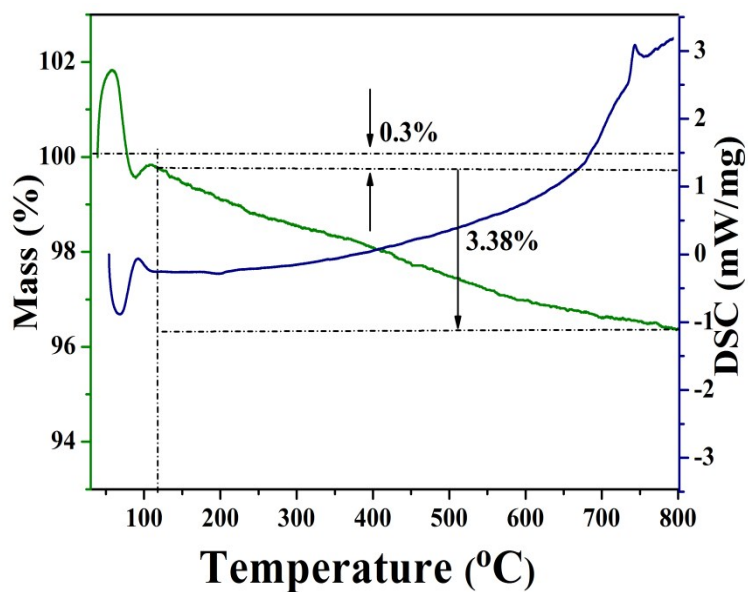

Figure S4 TG and DSC profiles of as-prepared ms-LMO HMs.

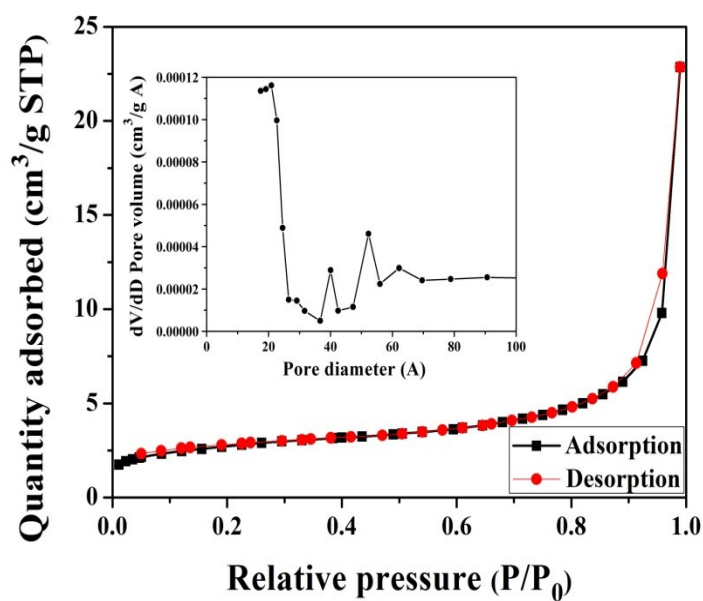

Figure S5 Nitrogen adsorption/desorption isotherm of the ms-LMO HMs (inset: the corresponding pore distribution profiles).

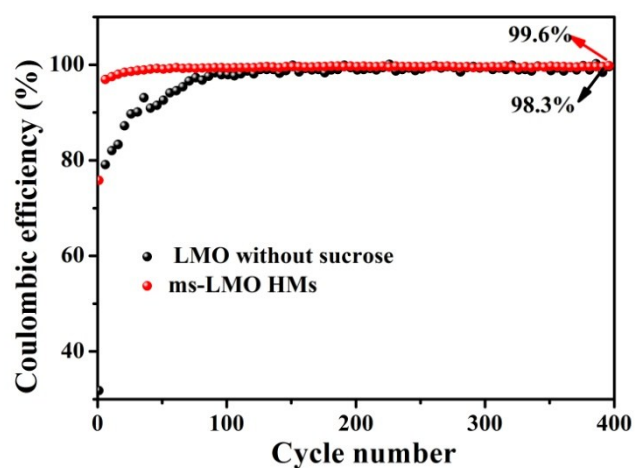

**Figure S6** Coulombic efficiency of ms-LMO HMs and LMO without sucrose

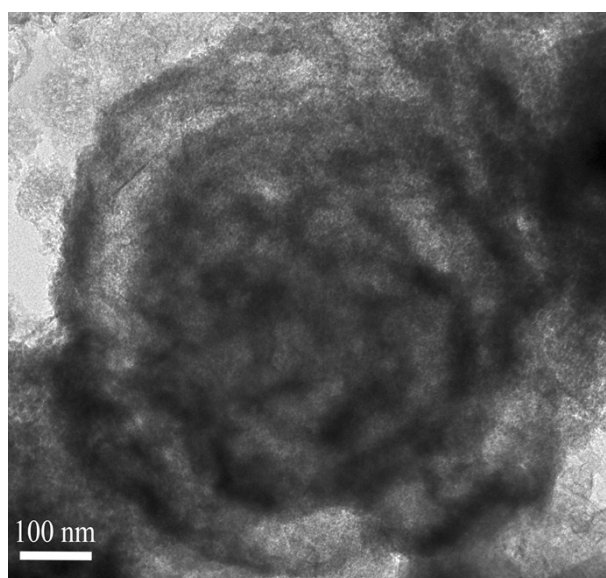

**Figure S7** TEM image of the ms-LMO HMs after 400 cycles
